# Supplementary material for: IL-1RT1 signaling antagonizes IL-11 induced STAT3 dependent cardiac and antral stomach tumor development through myeloid cell enrichment
Source: PubMed Central journal article supplement (PMC4359248; doi:10.18632/oncotarget.2707), 2015-01-06
Supplement: oncotarget-06-679-s001.pdf [file oncotarget-06-679-s001.pdf]

SUPPLEMENTARY FIGURES AND TABLES

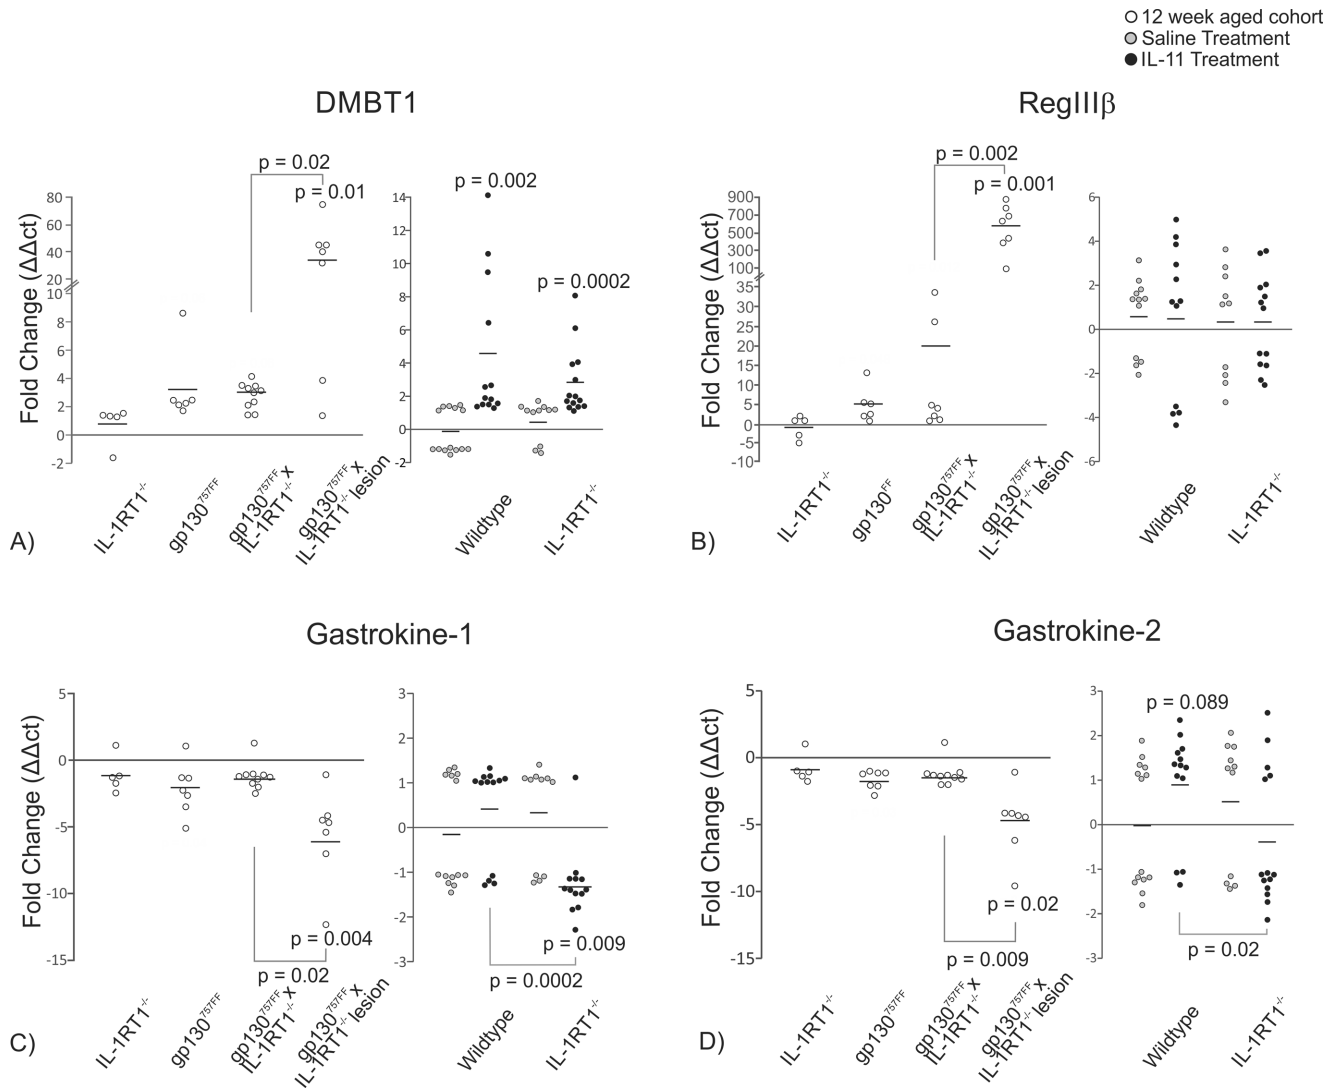

**Supplementary Figure 1: Proximal stomach mRNA expression in gp130<sup>757FF</sup> xIL-1RT1<sup>+/-</sup> cohort mice and wildtype and IL-1RT1<sup>+/-</sup> mice constitutively administered 1ug IL-11 daily for 7 days via QRT-PCR. Analysis of gastric inflammation and pathology: (A) DMBT1, (B) RegIII $\beta$ , (C) GKN-1 and (D) GKN-2. *p*-values are as indicated for statistically significant changes.**

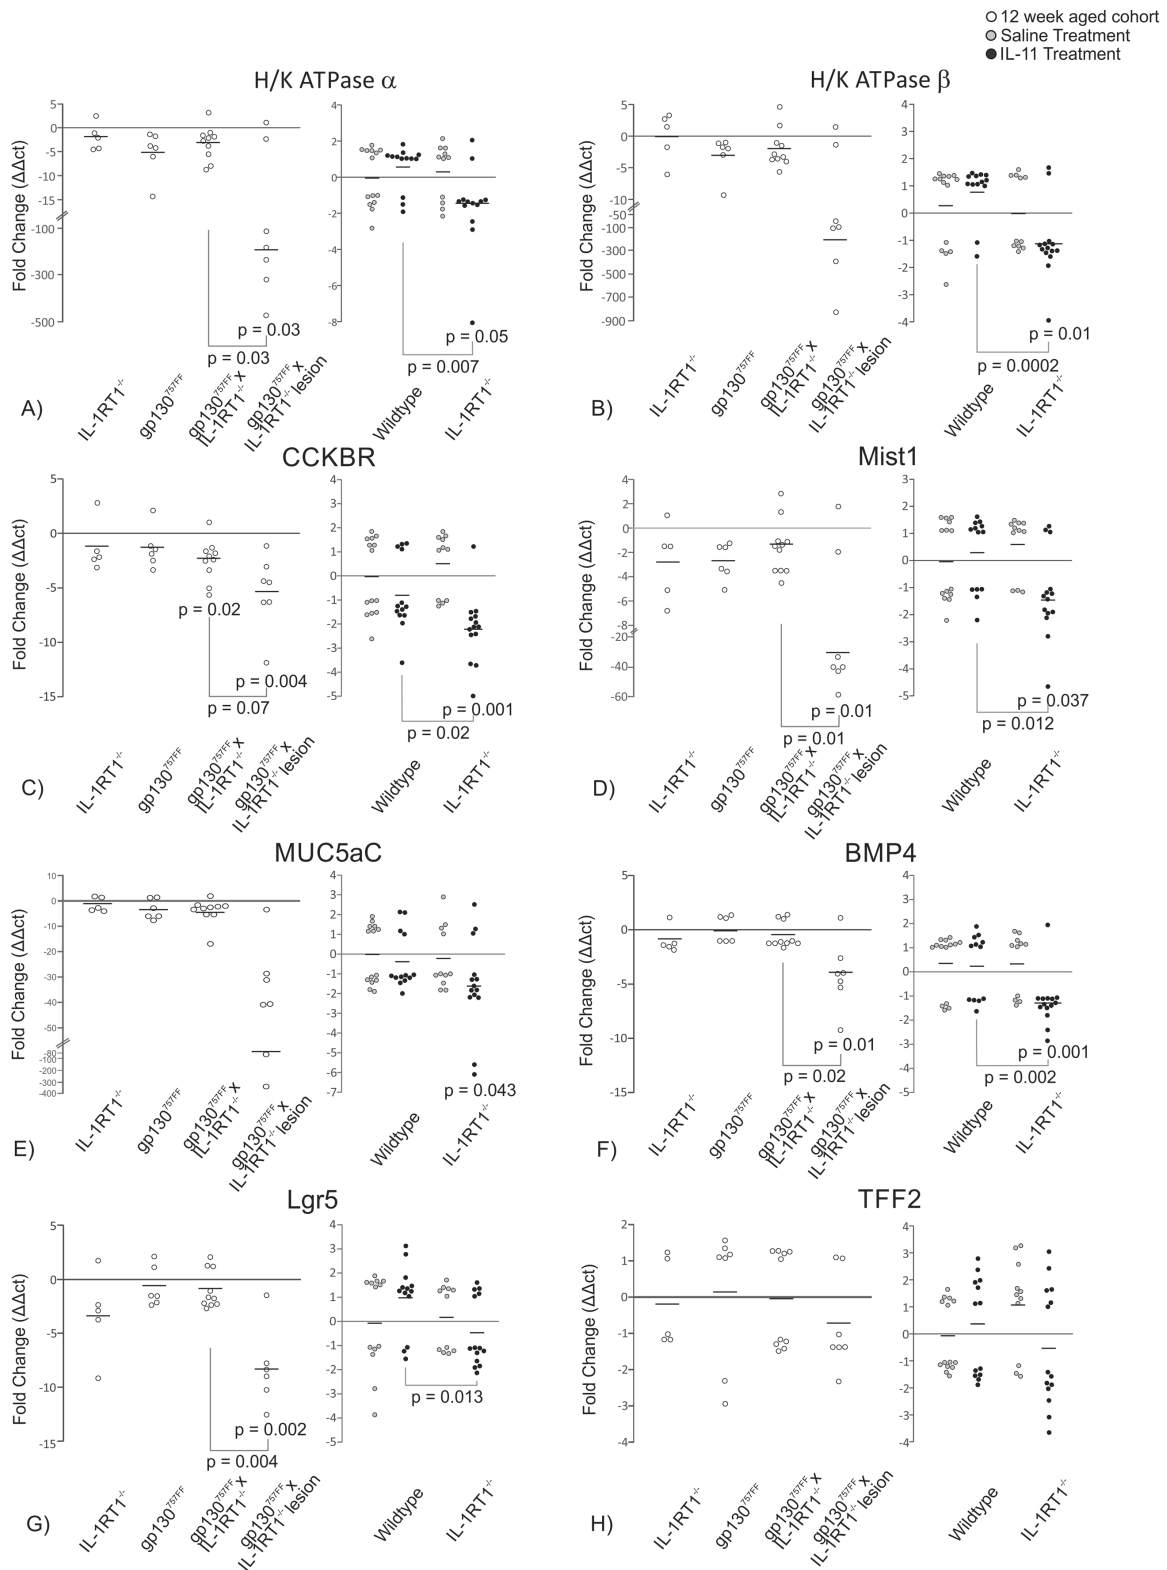

**Supplementary Figure 2: Proximal stomach mRNA expression in  $gp130^{757FF}$   $xIL-1RT1^{-/-}$  cohort mice and wildtype and  $IL-1RT1^{-/-}$  mice constitutively administered 1ug IL-11 daily for 7 days via QRT-PCR.** Analysis of gastric cell types using appropriate markers; parietal cells: (A) H/K ATPase  $\alpha$ , (B) H/K ATPase  $\beta$  and (C) CCKBR; Chief cells: (D) Mist1; Mucus secreting cells (E) Muc5aC; Progenitor cells: (F) BMP4 and (G) Lrg5; and SPEM pathology: (H) TFF2.  $p$ -values are presented for statistically significant changes ( $p < 0.05$ ).

**Supplementary Table 1: Primer sequences used for mRNA expression analysis via QRT-PCR in order as presented in results**

| Gene                | Forward Primer               | Reverse Primer           |
|---------------------|------------------------------|--------------------------|
| IL-1 $\alpha$       | AACCCATGATCTGGAAGAGACC       | TGGTGCTGAGATAGTGTGTTGTCC |
| IL-1 $\beta$        | CAGGCAGTATCACTCATTGTGG       | GTGCAGTTGTCTAATGGGAACG   |
| IL-1RT1             | CGGCGCATGTGCAGTTAATA         | TGTAGCCGTGAGGATGATAAAGC  |
| IL-1RAP             | CCCATAAGGATGGGACTTCT         | AGCGCTCCGAAGCATGACT      |
| IL-1RT2             | AAGGTTTCTGAATCCCCATTAC       | TTGAACTCTCTGCCACGAACTG   |
| IL-1RAN             | TCTGACAGTGGAACGGAATGAC       | TTGCATCTTGCCAGGGTCTTTT   |
| IL-11               | CTGCAAGCCCGACTGGAA           | AGGCCAGGCGAGACATCA       |
| IL-6                | ACAAAGCCAGAGTCCTTCAGAGA      | CTGTTAGGAGAGCATTGGAAATTG |
| DMBT1               | GCTCCACAAGCACAGATTCC         | TGCCATCTCATTGTTCTTGG     |
| RegIII $\beta$      | GAACCCATCTACTGCCTTAGACC      | CTTCACATTTTGTCCCTTGTC    |
| Gastrokine-1        | CTTCAGGACCTCGATAACAATGG      | TTGAGTACAAAGGCTGGTTTGG   |
| Gastrokine-2        | AATGTAGACGGAAGTGGACAGC       | GCATCCTTGTTTATTCTGTGC    |
| S100A8              | GTCCTCAGTTTGTGCAGAATATAAA    | GCCAGAAGCTCTGCTACTCC     |
| S100A9              | CTCTTTAGCCTTGAAGAGCAAG       | TTCTTGCTCAGGGTGTGAGG     |
| MIP2                | AGTGAAGTGCCTGTCAATG          | TTCAGGGTCAAGGCAAAGT      |
| TNF $\alpha$        | TATGTCTCAGCCTCTTCTCATTCC     | ATGATCTGAGTGTGAGGGTCTGG  |
| IL-23               | GAGCAACTTCACACCTCCCTACTAGTAG | GGCCTGGAGGCTTCGAA        |
| Amphiregulin        | CTATCTTCTCTGCCATCATC         | CAACTTTTACCCTTGCAATTGCC  |
| Arg-1               | CTGCATGGGCAACCTGTGT          | CCTGGTACATCTGGGAAGTTTCC  |
| H/K ATPase $\alpha$ | CAAATATCATCGCCAGCTTCAA       | TCCCCGTCTCGGATCACA       |
| H/K ATPase $\beta$  | CCGGTGGGTGTGGATCAG           | GCAAAGAGCCCGGTCATG       |
| CCKBR               | ACAAATGTGGTCCGTGCTTCT        | GCGGGAGATGAGTCCATAGG     |
| Mist1               | CCAGGGTGTCTCTTCTTTTGG        | GGCGGAAGTTCACCATCCTT     |
| Muc5aC              | GCAGTTGTGTCACCATCATCTGTG     | GGGGCAGTCTTGACTAACCTCTT  |
| BMP4                | GCCGTCATTCCGGATTACAT         | CTCCTCACAGTGTGGCTCG      |
| Lgr5                | GGAATAAAGACGACGGCAACA        | GTCCCCTCATCTTGAAGTTG     |
| TFF2                | CCCCACAACAGAAAGAAC           | GGGCACTTCAAAGATCAG       |

**Supplementary Table 2: Antibodies used for protein detection via immunoblotting**

| Protein        | Antibody                               | Raised In | Company        | Reference No.  |
|----------------|----------------------------------------|-----------|----------------|----------------|
| $\beta$ -actin | $\beta$ -Actin (13E5) Rabbit mAntibody | Rabbit    | Cell signaling | #4970          |
| STAT3          | STAT3 Antibody                         | Rabbit    | Cell signaling | #9132          |
| p-STAT3        | Phospho-STAT3 (Tyr705) Antibody        | Rabbit    | Cell signaling | #9131          |
| ERK1/2         | p44/42 MAP Kinase Antibody             | Rabbit    | Cell signaling | #9102          |
| pERK1/2        | Phospho-p44/42 MAK Kinase Antibody     | Rabbit    | Cell signaling | #4377          |
| AKT            | AKT Antibody                           | Rabbit    | Cell signaling | #9272          |
| pAKT           | Phospho-AKT (Ser473) Antibody          | Rabbit    | Cell signaling | #4058          |
| STAT1          | STAT1 Antibody                         | Rabbit    | Cell signaling | #9172          |
| pSTAT1         | Phospho-STAT1 (Try-701) Antibody       | Rabbit    | Cell signaling | #9171          |
| mIL-11         | IL-11 Antibody                         | Mouse     | WEHI           | 3/99-4D9-27-25 |

**Supplementary Table 3: Fluorochromes used for Flow Cytometry analysis**

| Marker                | Fluorochromes | Company        | Reference No. |
|-----------------------|---------------|----------------|---------------|
| CD4                   | V450          | BD Biosciences | 560468        |
| CD8a                  | APC-Cy7       | BD Biosciences | 561967        |
| CD11b                 | PE            | BD Biosciences | 557397        |
| CD11c                 | APC           | BD Biosciences | 550261        |
| CD45R/B220            | FITC          | BD Biosciences | 553087        |
| Ly-6G and Ly6C (Gr-1) | PerCP-Cy5.5   | BD Biosciences | 552093        |

| Immune Cell      | Fluorochromes                                                                    |
|------------------|----------------------------------------------------------------------------------|
| MDSC CD11b+Gr-1+ | CD45 <sup>+</sup> /CD11b <sup>+</sup> /CD11c <sup>int</sup> /Gr-1 <sup>int</sup> |
| Th CD4+          | V450 <sup>+</sup> / APC-Cy7 <sup>-</sup>                                         |
| CTL CD8+         | V450 <sup>-</sup> / APC-Cy7 <sup>+</sup>                                         |
